# Supplementary material for: Gulf of Alaska ice-marginal lake area change over the Landsat record and potential physical controls
Source: Copernicus journal article supplement (doi:10.5194/tc-15-3255-2021), 2021-07-15
Supplement: Supplementary file 1 [file fieldArmstrongHuss_iceMarginalLakeCorrelationTable.xlsx]

## Sheet: allCorrToget
			Absolute area change				Relative area change
			Proglacial		Ice-dammed		Proglacial		Ice-dammed
	index	Parameter	τ	p	τ	p	τ	p	τ	p
	1	'lake_area_change'	N/A	N/A	N/A	N/A	0.143836	0.0725898	0.56044	0.00456598
	2	'long'	-0.0578387	0.472071	-0.164835	0.450563	0.0509893	0.526478	0.010989	1
	3	'lat'	0.0266362	0.742457	0.230769	0.27918	0.130898	0.102368	0.010989	1
	4	'elevation_m'	-0.267531	0.000841711	0.300019	0.153392	0.189025	0.018395	0.12223	0.582939
	5	'temp_jja_1960s_degC'	0.174004	0.0312298	-0.255571	0.227042	-0.136361	0.0915869	-0.12223	0.582939
	6	'temp_jja_1980s_degC'	0.19855	0.0140929	-0.201146	0.349853	-0.136215	0.0924389	-0.0670485	0.783344
	7	'temp_jja_2000s_degC'	0.189716	0.0188039	-0.201146	0.349853	-0.133646	0.0982024	-0.0670485	0.783344
	8	'tempChange_jja_2000s-1960s_degC'	0.040413	0.628616	0.092611	0.696466	0.00158482	0.988537	0.0231527	0.955559
	9	'precip_djf_1960s_mm'	-0.0556403	0.489816	-0.455584	0.0280642	-0.0670732	0.404572	-0.055559	0.826152
	10	'precip_djf_1960s_mm'	-0.0220953	0.786028	-0.43336	0.0369271	-0.0876191	0.275427	-0.0333354	0.912553
	11	'precip_djf_1960s_mm'	-0.0232425	0.77506	-0.455584	0.0280642	-0.0811584	0.312641	-0.055559	0.826152
	12	'precip_dfj_change_2000s-1960s_mm'	0.200652	0.0125495	-0.111748	0.620647	-0.15326	0.0567053	0.111748	0.620647
	13	'Init_lake_area'	0.329528	3.79825e-05	-0.406593	0.047176	-0.519787	8.00058e-11	-0.0549451	0.82991
	14	'glacier_Area'	0.289738	0.000444835	-0.381385	0.107328	-0.0209089	0.803644	0.0953463	0.726286
	15	'Zmin'	-0.263877	0.00139297	0.60386	0.00958316	0.201537	0.0146948	0.190693	0.441209
	16	'Zmax'	0.0653149	0.431067	0.127128	0.624065	0.00725721	0.933946	0.15891	0.528612
	17	'Zmed'	-0.0682886	0.410162	0.317821	0.183431	0.0665814	0.422038	0.222475	0.362727
	18	'Slope'	-0.212075	0.0121953	-0.0163039	1	0.0496158	0.560291	-0.21195	0.397321
	19	'Aspect'	0.0781552	0.345786	0.0317821	0.944183	-0.0516764	0.53419	0	1
	20	'Lmax'	0.271816	0.000986343	-0.349603	0.141482	-0.0456582	0.58296	-0.0635642	0.833635
	21	'glacierWid_m'	0.321631	0.000124388	-0.181818	0.459024	-0.136807	0.103292	0.181818	0.459024
	22	'valleyWid_m'	0.306229	0.000258897	-0.30303	0.19695	-0.110532	0.188447	-0.0606061	0.840588
	23	'1980s_averageAnnualBalance_mwea'	-0.00181119	0.987046	-0.0317821	0.944183	-0.0760698	0.366107	0.0635642	0.833635
	24	'1990s_averageAnnualBalance_mwea'	-0.0652027	0.438987	0	1	-0.0597691	0.478348	0.0953463	0.726286
	25	'2000s_averageAnnualBalance_mwea'	-0.0552411	0.512569	0.0635642	0.833635	-0.0552411	0.512569	0.15891	0.528612
	26	'2010s_averageAnnualBalance_mwea'	-0.172968	0.0392133	0.0317821	0.944183	-0.102332	0.223345	0	1
	27	'1980_2016_averageAnnualBalance_mwea'	-0.0697306	0.407657	0.0317821	0.944183	-0.0715418	0.395508	0.127128	0.624065
	28	'1980_2016_summedAnnualBalance_mwe'	-0.0697306	0.407657	0.0317821	0.944183	-0.0715418	0.395508	0.127128	0.624065
	29	'Area(km2)'	0.217104	0.0129723	-0.381385	0.107328	0.0794282	0.365401	0.0953463	0.726286
	30	'Volume(km3)'	0.202277	0.0206437	-0.381385	0.107328	0.0709558	0.419132	-0.0317821	0.944183
	31	'max_thick(m)'	0.179168	0.0406232	-0.190693	0.441209	0.0657304	0.45491	-0.0317821	0.944183
	32	'h_min'	-0.139301	0.111478	0.349603	0.141482	0.104343	0.23379	0.190693	0.441209
	33	'h_max'	-0.0799789	0.362183	0.15891	0.528612	0.189089	0.030571	0.127128	0.624065
	34	'h_med'	-0.152174	0.0822938	0.413167	0.0800579	0.193532	0.0270081	0.317821	0.183431
	35	'slope_AVG'	-0.171601	0.0510437	0.361873	0.133614	-0.0149218	0.869643	-0.13159	0.617075
	36	'b_tongue(mw.e.a-1)'	-0.0948094	0.279561	0.222475	0.362727	-0.0206568	0.817439	-0.127128	0.624065
	37	'acc_win(mw.e.a-1)'	0.0700455	0.426081	-0.635642	0.00632295	-0.177236	0.0430521	-0.15891	0.528612
	38	'tau(year)'	0.117804	0.17936	0.15891	0.528612	0.127355	0.146477	0	1
	39	'dBdz(mw.e./100m)'	0.140853	0.107446	-0.381385	0.107328	-0.17686	0.043088	0.0953463	0.726286
	42	'dBdz_acc(mw.e./100m)'	0.00370763	0.970925	-0.286039	0.233953	0.080226	0.368499	0.0222222	1
	43	'min_thickness_m'	0.176271	0.0473076	0.288889	0.291248	0.0338983	0.706696	0.466667	0.0725502
	44	'p25_thickness_m'	0.228249	0.0101609	0.333333	0.216373	0.119774	0.178385	0.688889	0.00468695
	45	'median_thickness_m'	0.250847	0.00472184	0.0222222	1	0.112994	0.204367	0.466667	0.0725502
	46	'mean_thickness_m'	0.241808	0.00646186	0.0222222	1	0.103955	0.243145	0.377778	0.155742
	47	'p75_thickness_m'	0.253107	0.0043591	-0.0222222	1	0.0926554	0.298525	0.422222	0.108313
	48	'max_thickness_m'	0.240678	0.00671577	-0.0666667	0.861801	0.0915254	0.304493	0.288889	0.291248
	49	'iqr_thickness_m'	0.235028	0.00812478	-0.377778	0.155742	0.0474576	0.59655	0.155556	0.600654
	50	'stdev_thickness_m'	0.241808	0.00646186	-0.333333	0.216373	0.0610169	0.494962	0.111111	0.72749
	51	dist_to_coast_km'	-0.2319	0.0085	0.389	0.1172	0.1565	0.0761	0.0926	0.754
