# Supplementary material for: Gulf of Alaska ice-marginal lake area change over the Landsat record and potential physical controls
Source: Copernicus journal article supplement (doi:10.5194/tc-15-3255-2021), 2021-07-15
Supplement: Supplementary file 2 [file tc-15-3255-2021-supplement.zip]

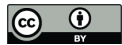

## *Supplement of*

# **Gulf of Alaska ice-marginal lake area change over the Landsat record and potential physical controls**

**Hannah R. Field et al.**

*Correspondence to:* William H. Armstrong ([armstrongwh@appstate.edu](mailto:armstrongwh@appstate.edu))

- tc-15-3255-2021-supplement-title-page.pdf
- fieldArmstrongHuss\_iceMargrinalLakes\_final\_supplement
  - .DS\_Store
  - fieldArmstrongHuss\_iceMarginalLakeCorrelationTable.xlsx
  - fieldArmstrongHuss\_iceMarginalLakeData.xlsx
  - iceMarginalLakeChange\_final\_supplement.docx
  - tc-2020-366-supplement.pdf
  - eMarginalLakeChange\_final\_supplement.docx

The copyright of individual parts of the supplement might differ from the article licence.
