# Supplementary material for: Gulf of Alaska ice-marginal lake area change over the Landsat record and potential physical controls
Source: Copernicus journal article supplement (doi:10.5194/tc-15-3255-2021), 2021-07-15
Supplement: Supplementary file 3 [file fieldArmstrongHuss_iceMarginalLakeData.xlsx]

## Sheet: lakeData
ind	lake_area_change_m2	long	lat	elevation_m	temp_jja_1960s_degC	temp_jja_1980s_degC	temp_jja_2000s_degC	tempChange_jja_2000s-1960s_degC	precip_djf_1960s_mm	precip_djf_1960s_mm	precip_djf_1960s_mm	precip_dfj_change_2000s-1960s_mm	Init_lake_area_m2	glacier_Area_km2	Zmin_m	Zmax_m	Zmed_m	Slope_deg	Aspect_deg	Lmax_m	glacierWid_m	valleyWid_m	1980s_averageAnnualBalance_mwea	1990s_averageAnnualBalance_mwea	2000s_averageAnnualBalance_mwea	2010s_averageAnnualBalance_mwea	1980_2016_averageAnnualBalance_mwea	1980_2016_summedAnnualBalance_mwe	Area(km2)	Volume(km3)	max_thick(m)	h_min_m	h_max_m	h_med_m	slope_AVG_deg	b_tongue(mw.e.a-1)	acc_win(mw.e.a-1)	tau(year)	dBdz(mw.e./100m)	dBdz_acc(mw.e./100m)	sample_area_m2	sample_area_px	min_thickness_m	p25_thickness_m	median_thickness_m	mean_thickness_m	p75_thickness_m	max_thickness_m	iqr_thickness_m
1	3.5203e+06	-141.175	59.9869	125	11.2	11.7	12.2	1	776	932	761	-15	203646	832.278	24	5462	531	10	205	75575	8281.81	19470.3	-1.0307	-0.88	-0.9131	-1.19457	-0.989189	-36.6	831.55	300.961	1002	45	5240	529	5.1	-8.26	4.22	121	1.2368	0.1413	6.45219e+07	6209	67.0434	295.555	347.954	348.668	406.025	530.037	110.471
2	2.50199e+07	-138.115	59.1852	80	12.4	12.8	13.3	0.900001	967	1082	1000	33	4.43839e+07	115.277	53	2455	1694	13	263	25158	4044	9023	0.0889	-0.385	-0.3245	-0.919429	-0.341676	-12.642	115.245	15.5034	385	926	2052	1528	4.7	-3.93	1.87	97	0.8177	0.3105
3	58687.7	-121.254	48.7687	1436	13.5	13.7	14.2	0.7	1069	1083	1000	-69	303488	0.165	1245	1560	1318	33.3	57	478	559.429	736.214	-0.6231	-0.6211	-0.845	-0.476857	-0.654865	-24.23
4	1.83828e+06	-119.162	53.1435	1791	9	9	9.2	0.2	326	295	260	-66	437198	1.931	1658	3262	2543	27.6	353	3292	429.191	557.123	-0.9243	-0.9306	-0.8701	-0.714143	-0.871595	-32.249	1.935	0.0846	82	1658	3262	2543	26.7	-6.81	0.82	12	0.7441	0.249	178426	356	16.047	29.1119	43.1513	45.042	60.6013	76.2118	31.4894
5	-4.11826e+06	-143.802	60.4018	227	11.1	11.5	12	0.9	752	983	810	58	2.62065e+07	743.599	2	3104	1097	13	210	66592	30563	40713	0.0494	-0.171	-0.3763	-0.713429	-0.269541	-9.973	743.49	262.905	909	135	2888	1107	4.2	-5.8	2.48	156	0.7491	0.2613	1.05463e+06	8140	58.3969	331.96	459.094	436.342	576.149	698.928	244.189
6	9.52529e+06	-148.768	60.0135	192	12.3	12.5	12.9	0.599999	649	941	772	123	8.38419e+06	122.352	0	1642	972	11	194	19936	2320.16	3881.99	0.4561	0.1328	-0.2933	-0.384571	0.00713513	0.264	122.255	22.8015	549	281	1549	979	5.9	-6.77	2.35	81	1.1866	0.3519	4.84534e+06	1445	115.407	260.174	301.443	302.878	350.856	437.278	90.6826
7	-2.43014e+06	-152.438	60.9639	359	9.3	9.7	10.4	1.1	348	533	420	72	1.07248e+07	81.533	225	2342	1338	11	20	37329	4232	10826	0.5878	-0.1786	-0.1945	-0.507571	-0.038	-1.406	81.425	16.0371	691	687	1706	1324	4.8	-3.39	2.17	203	0.6614	0.2977	1.64957e+06	371	45.2548	83.5645	101.432	105.808	116.173	224.709	32.6083
8	-35043	-152.89	59.9803	368	10.4	10.1	10.9	0.5	279	434	318	39	123898	49.721	82	2865	566	13	107	17958	7284	13605	0.3474	-0.3414	-0.2901	-0.708429	-0.210811	-7.8	49.672	8.3974	366	316	793	579	2.9	-1.45	2.12	252	0.5556	0.2997	4.14774e+06	3904	31.6542	118.296	329.543	249.4	367.671	401.763	249.375
9	-91609.7	-132.392	57.7594	250	11.3	11.6	11.9	0.599999	462	459	454	-8	6.03758e+06	55.317	451	2353	1677	10	59	20322	872.527	3531.78	-0.3671	-0.7347	-0.3787	-1.14329	-0.616432	-22.808	55.305	11.2262	479	564	2306	1689	6.4	-9.31	1.3	51	0.819	0.2688
10	1.33054e+06	-123.891	50.4503	1174	9.7	9.6	10.1	0.400001	1351	1192	1076	-275	0.1	15.042	1067	2525	1904	15.3	334	8900	491.733	1160.86	-0.1259	-0.259	-0.7167	-0.493286	-0.391054	-14.469	15.026	1.6604	324	1067	2525	1904	12.9	-8.19	2.65	39	1.0542	0.3337	417447	705	34.2811	70.5116	89.2928	85.9845	102.427	126.505	31.9154
11	6.08979e+06	-137.621	58.7634	396	9.1	9.6	10.1	1	1782	1984	1897	115	4.74227e+06	165.674	9	4684	1657	18	241	33984	2732	10203	-0.1385	-0.4369	-0.412	-0.838571	-0.425514	-15.744	165.77	25.1768	439	547	1590	1214	5.7	-4.51	1.93	97	0.8354	0.2963	4.14774e+06	616	95.853	237.706	299.067	288.926	344.545	412.862	106.84
12	-175153	-151.993	61.4896	636	9.3	10.2	10.8	1.5	522	713	617	95	1.31257e+06	341.521	137	3449	1320	12	88	45504	2819	7563	0.6681	-0.0395	-0.1577	-0.522714	0.0283784	1.05	341.15	88.0628	781	244	3397	1340	6.3	-7.29	2.17	107	0.7162	0.1907
13	1833.11	-151.993	61.4894	636	9.3	10.2	10.8	1.5	522	713	617	95	1.24794e+06	341.521	137	3449	1320	12	88	45504	4332.86	7146.04	0.6681	-0.0395	-0.1577	-0.522714	0.0283784	1.05	341.15	88.0628	781	244	3397	1340	6.3	-7.29	2.17	107	0.7162	0.1907	1.77644e+07	1069	192.273	387.97	445.449	435.314	494.451	613.664	106.481
14	2.48341e+06	-148.536	61.2794	118	12.8	12.6	13.3	0.5	294	310	288	-6	2.52557e+07	219.444	61	2918	1435	12	320	29101	3087.45	6098.66																			9.09645e+06	676	75.5734	217.23	268.923	259.933	301.907	416.159	84.6769
15	4.42216e+07	-138.883	59.4813	124	11.1	11.6	12.1	1	1111	1267	1110	-1	5.32955e+07	238.307	28	1669	480	5	193	31975	6469	16035	-0.4122	-0.4289	-0.528	-1.163	-0.590054	-21.832	238.17	78.0304	720	265	1569	594	2.7	-3.44	3.3	209	0.9272	0.3813	2.17265e+07	7408	60.5876	305.521	382.621	375.525	449.676	544.271	144.155
16	-145925	-116.365	51.5856	1801	9	8.9	8.8	-0.2	383	314	256	-127	5.56488e+06	5.408	2144	3030	2617	16.5	3	3294	1472.92	2813.25	-0.9895	-0.9784	-0.9713	-0.845429	-0.954324	-35.31	5.402	0.3231	118	2144	3029	2617	12.7	-4.26	0.73	27	0.6997	0.3616	474304	771	21.521	33.0285	39.4302	41.6514	50.5998	67.7365	17.5713
17	412175	-146.838	63.3976	1033	8.8	9.1	9.5	0.7	235	225	139	-96	341552	39.764	884	2445	1904	11	278	16489	676.624	2681.4	0.1982	0.0534	-0.278	-0.469143	-0.0958919	-3.548	56.462	8.238	345	1037	2498	1791	7.8	-2.64	0.64	130	0.4037	0.2008	1.71656e+06	1631	65.0212	169.926	202.129	198.042	232.146	259.159	62.22
18	1.34351e+06	-134.563	58.4253	15	9.9	10.6	10.9	1	671	656	703	32	3.18512e+06	167.667	139	2175	1161	10	17	26066			0.6592	0.0635	-0.1669	-0.591143	0.0383784	1.42	167.615	32.3811	524	311	2116	1176	6.8	-6.03	2.61	86	0.8241	0.3383
19	63887.8	-121.604	48.8529	1172	12.3	12.5	13	0.7	1066	1005	964	-102	157898	1.615	1189	2565	1784	30.8	356	2417	415.567	852.542	-0.4275	-0.3531	-0.7847	-0.210286	-0.462838	-17.125	1.613	0.0573	77	1189	2565	1784	29.6	-4.41	2.8	17	0.8604	0.3165	144596	216	18.4377	32.4939	43.2245	41.9357	51.9309	66.8312	19.4371
20	891777	-126.385	51.4962	1128	10	10	10.6	0.6	1579	1458	1184	-395	2827.54	5.654	1264	1985	1644	11.2	322	4514	738.34	1586.15	-0.7525	-0.7496	-0.7776	-1.25314	-0.853216	-31.569	5.654	0.4209	186	1263	1985	1644	9.8	-4.01	2.21	46	0.9019	0.427	253123	346	28.694	46.2218	60.2952	59.7228	73.0169	91.2199	26.7951
21	223040	-121.232	48.9872	2117	11.1	11.1	11.7	0.599999	1177	1209	1112	-65	418528	0.77	2060	2659	2240	24.8	329	1655	759.934	984.562	-0.3479	-0.4471	-0.7526	-0.379571	-0.490081	-18.133
22	3.63034e+06	-133.466	58.3147	324	10	10.7	10.9	0.9	757	738	769	12	3.75794e+06	24.396	200	2108	1215	16	286	10186	1179.58	4001.78	-0.4221	-0.7035	-0.4405	-1.273	-0.664108	-24.572	24.398	2.9075	376	354	2064	1238	11.7	-7.53	2.51	49	0.9412	0.359	1.36754e+06	2063	70.9972	150.026	192.171	189.166	227.652	285.037	77.6258
23	-1.59251e+06	-151.903	61.4967	420	10.4	11.2	11.9	1.5	448	603	522	74	6.21802e+06	341.521	137	3449	1320	12	88	45504	2297	12875	0.6681	-0.0395	-0.1577	-0.522714	0.0283784	1.05	341.15	88.0628	781	244	3397	1340	6.3	-7.29	2.17	107	0.7162	0.1907	2.17265e+07	1315	163.969	363.704	453.253	443.909	530.644	618.755	166.941
24	-381056	-151.903	61.4977	420	10.4	11.2	11.9	1.5	448	603	522	74	6.09005e+06	341.521	137	3449	1320	12	88	45504	3840.91	7158.26	0.6681	-0.0395	-0.1577	-0.522714	0.0283784	1.05	341.15	88.0628	781	244	3397	1340	6.3	-7.29	2.17	107	0.7162	0.1907
25	3278.04	-121.584	48.8048	1155	12.4	12.6	13	0.6	1123	1057	1016	-107	37780	0.252	1011	1449	1238	23.5	150	697	652.69	1161.28	-0.4551	-0.5568	-0.8005	-0.339286	-0.554027	-20.499	0.249	0.006	43	1011	1449	1238	26.4	-2.13	2.05	20	0.6795	0.4581	22732.6	41	12.0054	21.2593	28.7488	28.3189	35.6027	44.7476	14.3433
26	-3.66221e+06	-147.136	61.0331	115	12.2	12.4	12.8	0.6	947	1120	1001	54	6.65548e+06	1.288	535	1060	830	18	58	1974	938.144	1418.54	0.8535	0.467	-0.0335	-0.288571	0.293243	10.85	1.285	0.0539	83	571	1054	846	14.4	-1.6	3.19	51	0.9459	0.5305
27	789878	-133.904	58.5465	9	11	11.7	12	1	607	593	625	18	1.1732e+07	91.099	0	2062	1267	6	157	28942	1219.77	2928.11	-0.5929	-0.9829	-0.4942	-1.28143	-0.801892	-29.67	91.052	23.8232	782	78	2002	1280	3.9	-10.94	1.69	71	0.8861	0.313	3.60828e+06	1508	31.8215	120.357	172.351	168.41	211.404	294.498	91.0463
28	4.60931e+06	-133.717	58.7987	164	8.7	9.4	9.6	0.900001	693	679	704	11	89432.9	148.734	103	2283	1686	8	76	36041	1605.01	5695.38	-0.5697	-0.8767	-0.4908	-1.23071	-0.756405	-27.987	148.57	38.8627	617	175	2208	1703	3.9	-10.24	1.62	60	0.8398	0.2933	6.12232e+06	1561	65.7834	271.717	350.874	327.979	395.953	441.562	124.236
29	285187	-134.925	57.0101	595	8.6	9	9.4	0.799999	1435	1484	1494	59	180.104	1.73	545	1598	1224	17	93	3792	294.984	629.737	-0.5993	-0.5449	-0.4762	-0.843286	-0.597486	-22.107	1.726	0.0966	127	640	1578	1215	15.6	-5.74	1.8	22	1.0905	0.4228
30	2.98847e+06	-131.816	56.8321	141	12.5	12.6	13	0.5	627	608	596	-31	1.12891e+07	136.264	62	2412	1090	12	101	27788	1778.76	3939.81	-0.5226	-0.6003	-0.3968	-1.47357	-0.689514	-25.512	136.27	29.9375	602	156	2385	1120	8.1	-10.5	2.69	57	1.1012	0.3655	4.8267e+06	1678	66.5566	194.364	251.874	259.244	334.152	388.918	139.788
31	622485	-129.257	53.9808	600	10.5	10.6	11.1	0.6	1922	1742	1433	-489	0.26595	0.386	475	720	577	18.7	340	739	857.558	1778.45	-1.3156	-0.8797	-0.7655	-1.82757	-1.14597	-42.401
32	667537	-129.206	53.9713	514	11	11.1	11.6	0.6	1880	1696	1395	-485	5.67902	1.693	353	772	489	12.1	9	2940	738.22	1853.79	-1.2893	-0.9051	-0.7826	-1.75043	-1.13576	-42.023
33	102150	-128.981	54.2164	481	9	9.1	9.5	0.5	1306	1146	952	-354	219424	6.594	457	2118	1555	19.9	65	6131	463.017	874.301	-0.9999	-0.9979	-0.6903	-1.545	-1.01881	-37.696	6.587	0.5071	205	457	2118	1555	16.6	-11.05	1.67	18	1.1119	0.3164	347981	429	15.3769	37.0559	56.74	59.1798	79.7672	118.103	42.7113
34	1.61178e+06	-135.575	59.4976	379	11.3	11.7	12.1	0.8	340	314	348	8	66390.7	37.547	109	2233	1190	16	125	16774	1259.04	3399.59	-0.4008	-0.808	-0.4591	-1.27043	-0.691135	-25.572	37.539	5.4705	427	334	2196	1210	10.9	-6.09	2.22	70	0.7509	0.2979	2.12058e+06	3975	58.4302	173.069	223.581	215.994	252.842	406.34	79.7729
35	928810	-135.429	59.0897	99	12.5	13.1	13.4	0.9	422	398	437	15	564133	167.667	139	2175	1161	10	17	26066			0.6592	0.0635	-0.1669	-0.591143	0.0383784	1.42	167.615	32.3811	524	311	2116	1176	6.8	-6.03	2.61	86	0.8241	0.3383	1.04743e+07	3231	68.9912	228.139	276.702	275.865	316.935	464.696	88.7956
36	1.72278e+06	-117.429	52.1769	1565	7.1	7	7.1	0	500	405	343	-157	666203	29.983	1550	3638	2883	14.7	249	9285	1213.1	3180.89	-0.8846	-0.8809	-0.9008	-0.810429	-0.873946	-32.336	29.971	2.9405	220	1550	3638	2883	12.1	-9.1	0.41	24	0.7075	0.1591	590775	780	25.3357	54.4919	78.9617	84.6805	113.228	152.366	58.736
37	4.24669e+06	-123.517	50.8338	1528	9.2	9.1	9.6	0.400001	736	615	596	-140	2.14449e+06	81.977	1388	2885	2289	8.9	90	18576	1154.77	4641.25	-0.3647	-0.4398	-0.7519	-0.584571	-0.531243	-19.656	81.98	14.6472	378	1388	2885	2289	5.7	-6.94	1.88	54	0.858	0.2945	3.74198e+06	1217	96.7363	200.135	229.534	233.877	252.871	428.649	52.7352
38	1.18287e+06	-126.034	51.2844	687	10.6	10.6	11.2	0.599999	1139	1048	850	-289	805256	28.541	510	2256	1834	14.5	122	13679	447.039	2454.5	-0.8938	-0.7686	-0.8676	-1.15986	-0.903216	-33.419	28.545	4.0694	333	510	2256	1834	8.2	-13.82	1.83	24	1.2064	0.3079	406288	753	34.9759	91.8361	113.908	109.57	131.957	156.911	40.1206
39	1.18733e+06	-126.053	52.0542	1066	8.2	8.1	8.6	0.400001	890	786	641	-249	1.28975e+06	73.252	1099	2766	2200	9.3	13	16952	1239.52	3377.72	-0.6471	-0.7252	-0.7373	-1.102	-0.778649	-28.81	73.23	14.1579	426	1099	2766	2199	5.4	-8.71	1.24	48	0.8237	0.2529	1.82278e+06	695	39.1277	106.424	135.199	129.031	156.492	180.785	50.0687
40	148671	-127.029	52.4861	1036	9.9	9.8	10.3	0.400001	1257	1150	929	-328	938798	2.459	1142	1542	1284	9.1	3	2995	728.251	1546.31	-0.8547	-0.6246	-0.7243	-1.26671	-0.835216	-30.903
41	438687	-128.267	53.1575	662	10.5	10.5	11	0.5	2032	1804	1458	-574	22406.1	0.928	565	831	593	13.1	1	1323	747.229	1070.73	-1.451	-1.1431	-0.851	-1.87043	-1.28497	-47.544
42	248526	-127.511	52.9051	1524	10.5	10.4	10.8	0.3	960	869	700	-260	286909	2.346	871	2056	1496	24.1	49	3453	769.878	2472.56	-1.1559	-1.0296	-0.766	-1.47729	-1.07719	-39.856	2.348	0.1065	132	871	2056	1496	22	-6.06	2.7	21	1.0853	0.3661	351438	374	26.2643	58.5247	73.5159	70.1715	83.1683	96.9105	24.6436
43	1.36859e+06	-150.571	60.0462	176	12.8	12.5	13.1	0.3	183	250	194	11	1.2339e+06	307.536	67	1915	1180	5	300	34088	467.786	2258.54	0.3872	-0.3169	-0.3743	-0.829714	-0.239135	-8.848	307.34	96.4907	645	169	1750	1209	2.4	-8.14	1.7	79	0.8455	0.3083	4.7821e+06	379	57.8519	219.144	264.235	254.952	294.225	362.159	75.0808
44	1.57248e+06	-151.106	59.6076	634	12.5	12.2	12.8	0.3	260	413	281	21	2.94279e+06	68.328	47	1586	1033	8	300	18589	1225.35	2906	0.2253	-0.2471	-0.4548	-0.756714	-0.271973	-10.063	68.33	12.8928	457	254	1592	1058	5.4	-7.1	1.9	64	1.0592	0.3129
45	4.46323e+06	-153.44	58.7767	120	11.1	11.1	11.7	0.599999	334	436	356	22	5.43637e+06	79.504	81	2126	918	13	119	14154	1231.7	3865.84	0.0106	-0.3552	-0.5967	-0.861	-0.417297	-15.44	79.48	9.692	270	291	2099	940	9.2	-6.45	1.94	41	0.9899	0.2911	1.22138e+06	414	70.5431	126.85	144.73	148.035	168.787	228.773	41.9379
46	4.8661e+06	-146.466	61.7221	694	11.8	11.9	12.4	0.599999	87	91	78	-9	1.30399e+06	373.04	541	2893	1462	8	21	56055	3377.55	6718.41	0.7361	0.3317	-0.1287	-0.311571	0.194865	7.21	372.98	122.338	790	613	2773	1500	3.1	-4.93	1.62	160	0.6737	0.1887	2.02453e+06	1518	56.4083	419.9	505.777	502.656	605.125	738.282	185.226
47	8220.7	-144.274	69.3352	1691	3.6	4.3	4.8	1.2	168	126	85	-83	0.136541	2.179	1619	2640	2042	21	350	3358	359.641	550.358
48	42400.8	-145.026	69.0871	1465	2.7	3.5	4	1.3	114	87	57	-57	0.069959	0.161	1672	1940	1799	32	2	211	320.217	1398.08
49	17993.9	-152.251	68.2248	1446	5.8	6.3	7	1.2	136	107	103	-33	34565.9	0.51	1447	1813	1570	18	26	1377	392.918	587.508	-0.1294	-0.3742	-0.3942	-0.495429	-0.336378	-12.446
50	1.51326e+06	-152.38	62.6799	853	7.6	8.3	9.2	1.6	91	109	106	15	464655	35.281	743	2278	1493	12	283	14040	1507.67	3885.36	0.2142	-0.1015	-0.2653	-0.497	-0.13527	-5.005	35.257	5.8962	395	864	2152	1519	6.1	-2.49	1	158	0.4272	0.1709	2.24528e+06	2526	81.5089	177.059	203.058	205.001	236.363	283.959	59.3039
51	1.25955e+06	-151.949	62.5777	268	12.4	13.3	14.1	1.7	186	217	210	24	546903	195.803	213	3150	1321	14	154	36125	2952.87	4639.07	0.1495	-0.1704	-0.3021	-0.542429	-0.189919	-7.027	195.705	36.7847	615	306	3158	1347	7.6	-4	1.02	153	0.4021	0.1425	1.61726e+07	5841	33.1788	239.672	290.245	289.678	349.008	489.774	109.336
52	1.37844e+06	-146.524	63.2937	1033	9.9	10.2	10.6	0.700001	142	138	85	-57	189932	56.531	942	2584	1781	12	192	18292	0	0	0.1982	0.0534	-0.278	-0.469143	-0.0958919	-3.548	56.462	8.238	345	1037	2498	1791	7.8	-2.64	0.64	130	0.4037	0.2008	3.69165e+06	1424	106.872	227.637	273.241	271.097	321.56	381.948	93.9226
53	254081	-147.523	63.4894	1157	8.9	9.2	9.6	0.700001	207	188	126	-81	0.176855	32.959	978	2658	1902	12	189	13482	0	0	0.2095	0.049	-0.2708	-0.484714	-0.095027	-3.516	32.943	4.2246	322	1187	2598	1939	8.5	-2.82	0.63	114	0.4322	0.2239	1.24668e+06	1768	85.7392	172.952	203.057	197.797	224.96	286.749	52.0083
54	969761	-142.23	62.0249	1165	9.1	9.5	10	0.9	73	62	50	-23	73495.2	283.251	1064	3218	2379	13	11	33632	0	0	0.0059	-0.1965	-0.319	-0.53	-0.238	-8.806	283.04	65.5297	562	1119	3099	2390	4.2	-6.17	0.48	91	0.6177	0.0977	1.76773e+07	1204	94.8624	303.662	375.905	378.444	464.503	579.054	160.842
55	5.31177e+06	-142.888	62.1813	921	11.3	11.6	12.1	0.8	55	47	37	-18	646149	1028.8	870	4166	2248	9	45	84594	0	0	0.1219	-0.127	-0.3215	-0.537714	-0.19	-7.03	1028.04	401.385	956	885	4848	2246	3.7	-7.96	0.7	120	0.6674	0.0333	2.98286e+07	528	110.996	332.811	396.494	393.703	454.136	617.86	121.325
56	1.11611e+06	-154.178	58.4065	48	11.4	11.7	12.2	0.8	345	412	368	23	2.90185e+06	71.633	54	2289	1148	14	110	18641	1998.31	4004	0.2232	-0.2508	-0.4753	-0.625571	-0.25427	-9.408	71.532	8.7136	308	131	2234	1165	11.3	-5.86	1.65	52	0.6715	0.241	4.2484e+06	1102	67.3258	211.609	261.648	257.973	299.224	386.476	87.6143
57	1.08784e+06	-146.158	61.1538	191	10.1	10.3	10.8	0.7	481	578	486	5	740677	137.956	65	2350	1411	12	119	33443	1379.48	4847.84	0.5931	0.0813	-0.2005	-0.483143	0.0366757	1.357	137.822	27.4404	592	226	2273	1439	6.8	-7.64	1.84	77	0.7711	0.2731	3.37831e+06	1066	76.6182	244.107	299.631	337.826	449.658	571.991	205.551
58	119372	-151.148	59.3481	746	12.1	11.9	12.4	0.299999	494	820	536	42	45064.5	0.917	660	1148	963	21	233	1325	2593	3712	0.3354	-0.1309	-0.394	-0.696143	-0.182919	-6.768	0.92	0.0307	68	668	1134	972	19.1	-2.24	2.19	30	0.8317	0.4336	359898	73	14.8012	19.0757	22.5756	22.0915	24.4781	30.5587	5.40245
59	1.06419e+06	-138.004	60.1081	685	11.8	12	12.6	0.8	388	402	376	-12	600138	440.917	417	4567	1379	9	85	80951	683	5933	0.05	-0.284	-0.3392	-1.04271	-0.352189	-13.031	440.92	143.228	790	548	4371	1390	4.4	-6.59	2.06	119	0.7769	0.0889	1.56696e+07	1004	64.9143	328.516	386.268	379.921	438.743	584.639	110.226
60	3.25361e+06	-142.475	61.6022	729	11.7	12.1	12.5	0.8	132	124	96	-36	152628	304.151	648	3296	2152	13	106	42494	4414	19023	-0.0135	-0.2225	-0.3358	-0.572571	-0.262865	-9.726	304.21	71.7571	677	771	3114	2173	5	-6.7	0.53	101	0.5725	0.1	1.24448e+08	9812	230.037	536.918	626.163	613.292	721.244	801.295	184.326
61	2.06181e+07	-138.096	59.0173	120	11.6	12	12.6	1	849	956	883	34	2.47016e+07	237.25	89	4679	1391	11	266	43460	7427	13292	-0.1752	-0.5171	-0.4244	-1.04557	-0.499622	-18.486	237.2	39.2946	485	691	2341	1176	5.7	-3.38	2.13	143	0.7228	0.2755	3.57529e+07	2223	82.4842	236.124	477.131	406.135	534.895	659.788	298.771
62	1.62021e+07	-137.577	59.3659	356	12	12.3	12.9	0.9	318	339	326	8	1.61253e+07	69.161	259	2634	1373	15	359	22679	2960	11613	-0.2587	-0.5505	-0.429	-0.974857	-0.519081	-19.206	69.17	10.0125	344	314	2476	1390	10.5	-10.2	2.18	33	1.0767	0.3306	2.24242e+06	731	37.1511	143.744	183.825	182.121	225.906	267.617	82.1621
63	7.77366e+06	-144.604	60.7918	111	11.9	12.2	12.7	0.8	453	562	458	5	2.13367e+06	189.244	66	1848	824	10	58	30187	5347	10566	0.015	-0.2157	-0.3733	-0.578857	-0.264649	-9.792	189.285	47.0082	649	140	2043	865	5.4	-7.9	3.22	82	1.2715	0.4058	10826120	2599	146.724	338.194	382.487	373.534	422.252	505.879	84.0578
64	73693.9	-130.068	56.1839	945	9.4	9.3	9.8	0.400001	980	827	785	-195	775733	82.89	197	2344	1505	11	83	25370	2429	9515	-0.5203	-0.586	-0.3065	-1.34214	-0.635757	-23.523	82.912	15.7161	496	386	2320	1529	6.5	-10.1	1.86	49	0.9287	0.3148	4.85896e+06	1402	80.5605	260.24	335.206	321.839	390.288	507.525	130.049
65	-37988.3	-134.739	58.5796	211	9.8	10.6	10.8	1	606	580	633	27	477782	40.504	178	1938	1186	12	217	12730	1224	6765	-0.6013	-0.946	-0.5066	-1.32486	-0.805757	-29.813	40.478	5.1401	328	328	1928	1222	8.6	-8.04	1.99	40	0.8611	0.3276	778115	1105	28.1263	85.8118	114.481	120.896	157.926	206.359	72.114
66	3.60919e+06	-134.599	58.7676	244	8.6	9.3	9.6	1	1073	1029	1119	46	1.13148e+06	229.99	107	2359	1430	10	212	36343	2303	5399	-0.6784	-1.0109	-0.618	-1.316	-0.872568	-32.285	229.8	53.0432	663	266	2277	1445	5	-9.53	1.49	69	0.7993	0.2752	4.87492e+06	402	55.3378	220.967	297.122	292.753	372.663	421.682	151.696
67	6.04403e+06	-134.745	58.9475	210	10.5	11.2	11.5	1	492	454	504	12	1.10459e+06	192.91	84	2287	1600	8	241	33120	3749	12006	-0.4023	-0.7261	-0.4607	-1.08071	-0.633946	-23.456	192.795	49.7596	786	163	2204	1613	3.9	-8.21	1.36	95	0.6669	0.2406	1.05577e+07	3019	69.3143	219.572	262.382	256.626	289.771	425.975	70.1995
68	4.16173e+06	-135.042	59.2236	337	10.4	10.9	11.3	0.900001	498	457	510	12	0.287161	461.384	104	2297	1466	9	250	43084	2216	10170	-0.3762	-0.7707	-0.4463	-1.13729	-0.645757	-23.893	461.22	128.42	729	309	2159	1482	3.5	-8.14	1.41	89	0.6996	0.2481	6.67132e+06	565	117.888	269.393	320.803	313.236	365.681	446.607	96.2881
69	477931	-152.705	60.8211	432	9.6	9.7	10.5	0.9	306	494	379	73	471423	9.583	166	1943	1487	18	341	7032	1294	5009	0.504	-0.2527	-0.2926	-0.491286	-0.104108	-3.852	9.579	0.7108	186	599	1672	1465	11.1	-4.12	1.86	45	0.6615	0.2859	4.85896e+06	1961	39.0882	162.827	199.111	190.21	229.598	309.763	66.7715
70	-15649.8	-153.016	60.2378	87	11.3	11.1	11.9	0.599999	232	365	272	40	78906.5	92.965	33	2976	824	13	346	26590	3244	8019	1.8673	1.2144	1.3792	1.11757	1.41708	52.432	92.935	23.1251	625	17	2867	855	8.5	-2.06	2.7	303	0.576	0.2129	5.39248e+06	2996	66.4734	185.429	261.766	252.288	320.613	387.688	135.184
71	-7046.42	-149.908	60.2581	633	12.4	12.1	12.8	0.400001	389	497	427	38	344430	98.233	364	1658	1113	7	338	28886	1917	8270	0.2623	-0.3707	-0.4495	-1.044	-0.348297	-12.887	98.255	27.6509	568	586	1598	1144	2.5	-4.08	2.05	139	0.7342	0.3015	1.11529e+07	4541	46.5778	188.255	288.882	270.466	347.029	394.39	158.775
72	-200929	-150.435	62.7262	387	12.7	13	13.9	1.2	258	255	235	-23	250394	335.936	192	4820	1609	13	151	63970	8899	27516	0.1252	-0.0884	-0.1859	-0.420571	-0.119865	-4.435	335.77	96.1985	906	207	4636	1659	7.6	-4.54	0.88	199	0.4018	0.0638	3.89577e+07	3936	109.693	314.526	391.862	386.178	468.772	642.886	154.246
73	3.60083e+06	-150.04	60.3008	197	13.1	12.7	13.4	0.299999	229	282	244	15	2.62069e+06	171.454	133	1820	1194	7	3	32366	2203	12818	0.2556	-0.3516	-0.4005	-0.949	-0.31373	-11.608	171.407	57.5627	710	287	1750	1264	2.1	-7.27	1.6	97	0.7913	0.297	1.01157e+07	5698	83.9543	176.38	222.837	218.422	263.1	344.312	86.7201
74	1.92091e+06	-149.007	60.0979	126	12.6	12.8	13.2	0.599999	465	658	546	81	4.52298e+06	115.1	7	1817	1211	9	239	27875	2774	12105	0.3785	0.0031	-0.2924	-0.331571	-0.0386216	-1.429	115.01	26.0688	562	124	1777	1244	4.2	-9.91	1.6	56	1.1442	0.3148	5.34346e+06	2078	65.5252	276.733	326.7	322.442	380.044	484.6	103.311
75	272511	-148.999	60.5785	508	12	11.8	12.5	0.5	705	796	740	35	73670.1	13.897	324	1699	1295	12	273	9308	785	5663	0.7648	0.0775	-0.2366	-0.616571	0.0470541	1.741													702320	723	35.5346	114.237	149.375	142.868	175.594	206.118	61.3568
76	1.32907e+06	-148.925	60.4823	995	12	11.9	12.5	0.5	1114	1327	1198	84	6.21136	50.928	477	1665	1010	11	247	14020	5140	6296	0.917	0.2217	-0.1631	-0.689143	0.133297	4.932	50.898	9.6831	564	610	1522	1014	4.6	-2.51	3.09	224	0.7914	0.4259	2.02453e+06	738	31.3348	65.1076	96.8589	112.459	149.556	269.004	84.4484
77	-674205	-146.632	61.5882	1341	9.6	9.6	10.2	0.599999	512	552	471	-41	4.62379e+06	373.04	541	2893	1462	8	21	56055	2611	6558	0.7361	0.3317	-0.1287	-0.311571	0.194865	7.21	372.98	122.338	790	613	2773	1500	3.1	-4.93	1.62	160	0.6737	0.1887	1.82732e+07	1799	120.976	350.221	409.486	407.721	472.359	562.98	122.138
78	-1.3958e+06	-146.882	61.6646	1833	9.4	9.5	10	0.6	297	313	268	-29	2.36459e+06	237.897	730	3663	1703	9	358	40256	2211	7613	0.7649	0.3093	-0.1472	-0.367286	0.181054	6.699	237.54	73.5616	885	761	3541	1731	4.9	-4.98	1.72	177	0.6767	0.1307	9.25059e+06	992	262.188	554.484	665.358	625.549	715.01	809.898	160.526
79	238027	-142.23	62.0251	1165	9.1	9.5	10	0.9	73	62	50	-23	1.05566e+06	283.251	1064	3218	2379	13	11	33632	7318	12401	0.0059	-0.1965	-0.319	-0.53	-0.238	-8.806	283.04	65.5297	562	1119	3099	2390	4.2	-6.17	0.48	91	0.6177	0.0977
80	2.19574e+06	-144.514	60.5166	201	9.8	10.2	10.7	0.9	865	1128	929	64	2.0854e+06	16.098	113	1586	872	17	268	9956	1604	5514	0.1018	-0.2258	-0.3994	-0.911143	-0.313838	-11.612	16.099	1.109	229	364	1397	757	11.5	-2.52	2.61	90	0.6856	0.2666	1.05463e+06	1070	81.7728	165.494	194.914	190.386	218.838	260.518	53.3444
81	2.03271e+06	-143.22	60.832	1036	9.7	10	10.5	0.8	567	620	494	-73	281704
82	8.44723e+06	-138.066	59.6766	305	12.3	12.6	13.1	0.8	340	358	334	-6	3.35682e+06	200.394	225	2439	1247	9	114	46070	10596	18910	-0.1714	-0.4712	-0.5277	-0.968429	-0.499514	-18.482	200.35	61.3858	1043	250	2368	1264	4.4	-7.07	1.99	147	0.8793	0.2943	3.37672e+07	2319	150.656	354.75	432.108	421.919	483.314	650.57	128.564
83	696776	-138.642	60.8192	931	10.3	10.6	11.2	0.9	167	166	150	-17	438411	1053.72	752	3597	2281	11	31	81627	7716	22192	-0.0637	-0.2571	-0.3479	-0.760286	-0.324568	-12.009	1054.08	343.094	868	814	3357	2308	3.5	-8.3	0.73	104	0.6503	0.1167	3.7671e+07	614	130.53	362.809	463.847	458.697	566.029	671.515	203.22
84	1.70084e+07	-138.021	60.2808	565	11.3	11.4	12	0.7	328	335	313	-15	2.50426e+06	582.83	475	4124	1556	11	61	66222	10596	18910	0.0518	-0.2715	-0.3363	-0.969429	-0.333676	-12.346	583.02	183.079	861	516	4162	1583	5.7	-8.55	1.75	100	0.8418	0.0895	3.4519e+07	2056	67.0707	308.187	395.693	388.381	477.03	601.769	168.843
85	-1.70709e+06	-136.684	58.3623	112	10.9	11.3	11.8	0.900001	846	911	925	79	3.18528e+06	549.286	12	3161	739	6	132	54535	7476	12864	1.2415	1.2852	1.2846	0.903571	1.20103	44.438	549.08	208.317	885	0	2999	760	3.6	-6.26	4.48	141	1.3133	0.3531	2.82052e+07	2870	162.217	357.891	456.465	452.772	568.966	661.894	211.075
86	54562.6	-137.251	59.3066	1224	9.1	9.4	9.9	0.799999	776	803	794	18	30271.7	64.523	821	2211	1674	9	284	19382	2802	7493	-0.0574	-0.6282	-0.3541	-1.03771	-0.477324	-17.661	64.487	10.2933	581	183	2070	1545	6.3	-15.96	1.28	36	1.188	0.3467	2.10789e+06	542	184.445	405.909	435.188	422.224	459.164	475.359	53.2541
87	338644	-135.794	59.2326	173	11.6	12.1	12.5	0.9	311	300	326	15	199611	16.269	157	2231	1354	18	4	11441	1041	3293	-0.3791	-0.8027	-0.4672	-1.06271	-0.64673	-23.929	16.258	1.5986	252	182	2191	1361	14.6	-8.52	2.06	29	0.8709	0.3058	762051	1276	36.9186	102.593	133.92	130.853	161.263	211.855	58.6698
88	-92244.1	-133.957	59.0574	909	8.5	9.1	9.4	0.9	599	576	604	5	1.05877e+06	86.656	873	2236	1768	4	359	30019	3417	10024	-0.4825	-0.9257	-0.4277	-1.16929	-0.717405	-26.544	86.645	27.0035	653	930	2193	1786	2.5	-6.66	1.44	98	0.8094	0.27	1.44013e+06	641	58.7286	112.528	134.228	130.43	151.003	168.523	38.4747
89	1.28068e+06	-133.643	58.5022	208	12	12.6	12.9	0.9	455	445	465	10	4.13087e+06	139.698	57	2263	1371	10	307	32020	2353	9174	-0.4371	-0.7193	-0.4411	-1.21086	-0.660838	-24.451	139.688	30.5757	560	275	2178	1396	5.3	-8.89	2.03	62	0.8959	0.328	7.96275e+06	2421	81.9943	278.415	353.358	356.454	433.753	575.657	155.339
90	4.22131e+06	-133.465	58.3149	324	10	10.7	10.9	0.9	757	738	769	12	3.33744e+06
91	60393.8	-130.072	56.1899	945	9.4	9.3	9.8	0.400001	980	827	785	-195	563764
92	1.46398e+06	-130.081	56.3483	653	10.4	10.3	10.8	0.400001	849	723	685	-164	2.04268e+06	142.064	518	2550	1609	12	57	24602	2840	6047	-0.5008	-0.6773	-0.2964	-1.35929	-0.655676	-24.26	141.89	25.9922	453	611	2447	1632	8.2	-9.24	1.87	49	0.9312	0.3154	3.20754e+06	1429	69.5629	141.928	172.584	177.697	210.774	292.125	68.8459
93	-1.80523e+06	-131.917	57.1721	535	11	11.1	11.5	0.5	664	664	648	-16	1.80523e+06	110.878	81	3026	1012	10	24	29435	2857	7363	-0.5799	-0.7611	-0.4685	-1.62971	-0.797378	-29.503	110.865	29.5656	648	132	2892	1035	7.3	-9.19	2.65	70	0.9084	0.3154	5.30712e+06	1642	70.9422	177.571	220.517	219.879	268.323	308.746	90.7521
94	47093.1	-153.656	60.0385	1029	8.8	8.7	9.5	0.7	418	611	484	66	95889.8	0.145	1195	1475	1342	22	98	649	703	4956	0.0447	-0.6662	-0.5791	-0.903714	-0.495459	-18.332													4.04123e+06	3797	46.6039	138.123	161.795	170.553	197.291	342.863	59.1687
95	-45385.9	-152.591	61.4293	1279	4.2	4.9	5.6	1.4	796	1181	997	201	56926	28.546	1010	2815	1723	15	268	13774	1151	7256	0.2358	-0.3115	-0.3957	-0.555	-0.232405	-8.599	28.549	3.6218	324	1050	2819	1705	11	-3.45	1.25	93	0.564	0.1865	975338	1216	79.4442	169.756	219.722	233.004	299.121	409.615	129.365
96	-36881	-152.407	62.5973	798	6.3	7.1	7.9	1.6	100	122	118	18	36881.3	46.549	389	2132	1173	14	260	15448	1585	2940	0.1192	-0.1658	-0.3268	-0.540857	-0.203243	-7.52	46.523	6.2104	416	489	2050	1191	9.9	-2.67	0.8	155	0.3854	0.1648	3.95651e+06	5156	47.0618	228.896	282.614	274.981	323.211	443.099	94.3152
97	197586	-151.504	62.7444	1096	7.9	8.7	9.5	1.6	352	383	367	15	102729	176.235	488	3740	1295	11	208	38399	8574	14900	0.0222	-0.2338	-0.3642	-0.574286	-0.26427	-9.778	176.188	47.7364	746	542	3665	1361	6.4	-3.66	0.84	203	0.3983	0.1056	2.08938e+07	8156	241.536	481.356	550.008	537.481	604.877	722.741	123.521
98	197586	-150.702	62.8605	1000	7.9	8.3	9.1	1.2	422	418	384	-38	102729
99	1.01718e+07	-149.556	59.9568	141	12.9	13	13.4	0.5	400	577	470	70	8.08631e+06	198.091	3	1749	1152	7	84	36600	8919	17768.7	0.4817	-0.2364	-0.3322	-0.947714	-0.202784	-7.503	198.02	58.2381	659	149	1696	1204	3.2	-7.29	2.46	90	0.952	0.3557	9.81837e+06	2662	70.5128	198.552	260.427	255.656	313.503	370.531	114.951
100	2.97313e+06	-149.786	59.8921	171	12.7	12.8	13.2	0.5	379	562	446	67	503003	31.634	43	1634	919	11	141	11409	2462	7666	0.4926	-0.2154	-0.3495	-1.05586	-0.219297	-8.114	31.618	4.2684	291	125	1677	939	7.8	-7.23	2.63	40	0.9834	0.3683	2.0034e+06	2238	33.1607	147.057	199.467	185.613	229.059	261.476	82.0022
101	1.50486e+06	-150.571	60.046	176	12.8	12.5	13.1	0.3	183	250	194	11	1.16567e+06
102	1.90495e+06	-151.106	59.6076	634	12.5	12.2	12.8	0.3	260	413	281	21	2.77295e+06	68.328	47	1586	1033	8	300	18589	2065	7080	0.2253	-0.2471	-0.4548	-0.756714	-0.271973	-10.063	68.33	12.8928	457	254	1592	1058	5.4	-7.1	1.9	64	1.0592	0.3129	2.92047e+06	861	39.6362	143.626	188.805	190.886	239.236	308.685	95.61
103	1.85854e+06	-148.536	61.281	118	12.8	12.6	13.3	0.5	294	310	288	-6	2.56681e+07
104	2.66636e+06	-148.536	61.28	118	12.8	12.6	13.3	0.5	294	310	288	-6	2.53331e+07	219.444	61	2918	1435	12	320	29101	5385	15200
105	5.44688e+06	-146.479	61.7173	653	11.8	11.9	12.4	0.599999	87	91	78	-9	1.39398e+06
106	644367	-142.099	60.0673	228	10	10.5	11	1	762	947	778	16	673803	27.425	59	1970	1398	13	236	13647	878.939	3257.78	-0.2618	-0.4158	-0.4946	-0.797143	-0.467622	-17.302	27.402	3.8199	336	149	2018	1432	8.3	-12.22	1.76	27	1.4689	0.3595	1.37108e+06	1547	98.9707	169.937	191.779	190.355	212.857	249.723	42.9201
107	-1.07765e+07	-144.414	60.692	244	11.6	11.9	12.4	0.799999	846	1069	871	25	1.5725e+07	421.012	41	3411	943	11	295	55594	9028	16694	0.0383	-0.3398	-0.4254	-0.816857	-0.351	-12.987	420.94	116.661	598	150	3372	984	5.2	-7.66	3.32	78	1.0136	0.2687	8.46255e+06	483	165.758	362.479	445.45	441.313	510.995	653.38	148.516
[truncated: 17 more columns]

## Sheet: readme
Data accompany "Gulf of Alaska ice-marginal lake area change over the Landsat record and potential physical controls" by Hannah Field, William Armstrong, and Matthias Huss. Field names are defined below.
field name	meaning
ind	unique number for each lake
lake_area_change_m2	change between last and first lake area observation (in square meters, where positive numbers indicate growth)
long	longitude (degrees)
lat	latitude (degrees)
elevation_m	a lake's elevation (m above sea level, from GTOPO30)
temp_jja_1960s_degC	reanalysis-derived june-august air temperature (deg C) for different decades
temp_jja_1980s_degC
temp_jja_2000s_degC
tempChange_jja_2000s-1960s_degC	summer air temperature change between the 2000s and 1960s (degrees C, positive numbers indicate warming)
precip_djf_1960s_mm	reanalysis-derived december-february precipation (mm) for different decades
precip_djf_1960s_mm
precip_djf_1960s_mm
precip_dfj_change_2000s-1960s_mm	winter precipitaiton change between the 2000s and 1960s (mm, positive numbers indicate wetting)
Init_lake_area_m2	a lake's first observed area (in square meters)
glacier_Area_km2	glacier area in km2
Zmin_m	Minimum, maximum, and median elevation of the associated glacier (m asl), extracted from RGI 6.0
Zmax_m
Zmed_m
Slope_deg	Slope (degrees) of the associated glacier
Aspect_deg	Aspect (degrees) of the associated glacier
Lmax_m	Associated glacier length in meters
glacierWid_m	Associated glacier widht in meters
valleyWid_m	Width of the valley in which the lake sits (m)
1980s_averageAnnualBalance_mwea	modeled average annual mass balance (meters water equivalent per year) for varied decades
1990s_averageAnnualBalance_mwea
2000s_averageAnnualBalance_mwea
2010s_averageAnnualBalance_mwea
1980_2016_averageAnnualBalance_mwea	Modeled average annual glacier mass balance (meters water equivalent per year) for the entire record
1980_2016_summedAnnualBalance_mwe	Cumulative average annual glacier mass balance (meters water equivalent) for the entire record
Area(km2)	glacier area in km2
Volume(km3)	glacier volume in km3
max_thick(m)	maximum thickness of the associated glacier in m
h_min_m	different estimates of average glacier thickness from range of Farinotti 2019 values
h_max_m
h_med_m
slope_AVG_deg	average glacier slope (deg)
b_tongue(mw.e.a-1)	mass balance of the glacier terminus (meters water equivalent per year)
acc_win(mw.e.a-1)	winter acumlution (meters water equivalent per year)
tau(year)	glacier response time (years)
dBdz(mw.e./100m)	mass balance gradient (meters water equivalent per year per 100 m elevation change)
dBdz_acc(mw.e./100m)	mass balance gradient of accumulation (meters water equivalent per year per 100 m elevation change)
sample_area_m2	size of sampling zone for determining lake adjacent ice thickness, in square meters
sample_area_px	size of sampling zone for determining lake adjacent ice thickness, in pixels
min_thickness_m	lake-adjacent ice thickness descriptive statistics
p25_thickness_m
median_thickness_m
mean_thickness_m
p75_thickness_m
max_thickness_m
iqr_thickness_m
stdev_thickness_m
lake type	a categorical classification of lake types, where 1-6 indicate different settings of proglacial lakes, and lake type 7 = ice-dammed
Growth style	a categorical classificaiton of the shape of lake area change timeseries (e.g., linear growth, accelerating growth)
Initial_Area_m2	initial lake area in m2
Final_area_m2	final lake area in m2
Rel_area_final_%	lake area change relative to final area (%)
Rel_area_intiail_%	lake area change relative to inntial area (%)
Detached?	a logical flag indicated whther a lake detached from its associated glacier during the study period (indicated by 1)
Date Detached	year of detachment
Newly Formed?	a logical flag indicated whther a lake appeared during the study period (indicated by 1)
Date Formed	year of formation
Lake_ID	a unique identifier for each lake that includes its latitude and longitude, with some part of lake name (if known)
dist_to_coast_km	lake's distance to a simplied coastline (km)
proglacial	a logical flag indicating whether the lake is proglacial
proglacial_and_good	a logical flag indicating whether the lake is proglacial and did not detatch during the study period
ice dammed	a logical flag indicating whether the lake is ice-dammed
ice dammed and good	a logical flag indicating whether the lake is ice-dammed and did not detatch during the study period
