# Supplementary material for: Gulf of Alaska ice-marginal lake area change over the Landsat record and potential physical controls
Source: Copernicus journal article supplement (doi:10.5194/tc-15-3255-2021), 2021-07-15
Supplement: Supplementary file 3 [file tc-15-3255-2021-supplement.zip]

Archive with 8 entries (7 files):
- tc-15-3255-2021-supplement-title-page.pdf
- fieldArmstrongHuss_iceMargrinalLakes_final_supplement/
- fieldArmstrongHuss_iceMargrinalLakes_final_supplement/~$eMarginalLakeChange_final_supplement.docx
- fieldArmstrongHuss_iceMargrinalLakes_final_supplement/.DS_Store
- fieldArmstrongHuss_iceMargrinalLakes_final_supplement/fieldArmstrongHuss_iceMarginalLakeData.xlsx
- fieldArmstrongHuss_iceMargrinalLakes_final_supplement/iceMarginalLakeChange_final_supplement.docx
- fieldArmstrongHuss_iceMargrinalLakes_final_supplement/tc-2020-366-supplement.pdf
- fieldArmstrongHuss_iceMargrinalLakes_final_supplement/fieldArmstrongHuss_iceMarginalLakeCorrelationTable.xlsx
